# Supplementary material
Source: Springer Nature journal article supplement (https://www.springermedizin.de/resource/supplementary/12882_2014_840_MOESM2_ESM.pdf/9454426)

# 24 hour Ambulatory Blood Pressure Monitoring

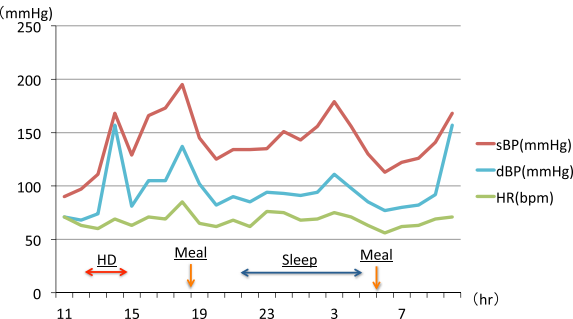

Supplement: MOESM2 [file 9454426]
